# Supplementary material for: Single cell force profiling of human myofibroblasts reveals a biophysical spectrum of cell states
Source: Oxford University Press journal article supplement (doi:10.1242/bio.049809), 2020-01-01
Supplement: bio049809supp.pdf [file bio049809supp.pdf]

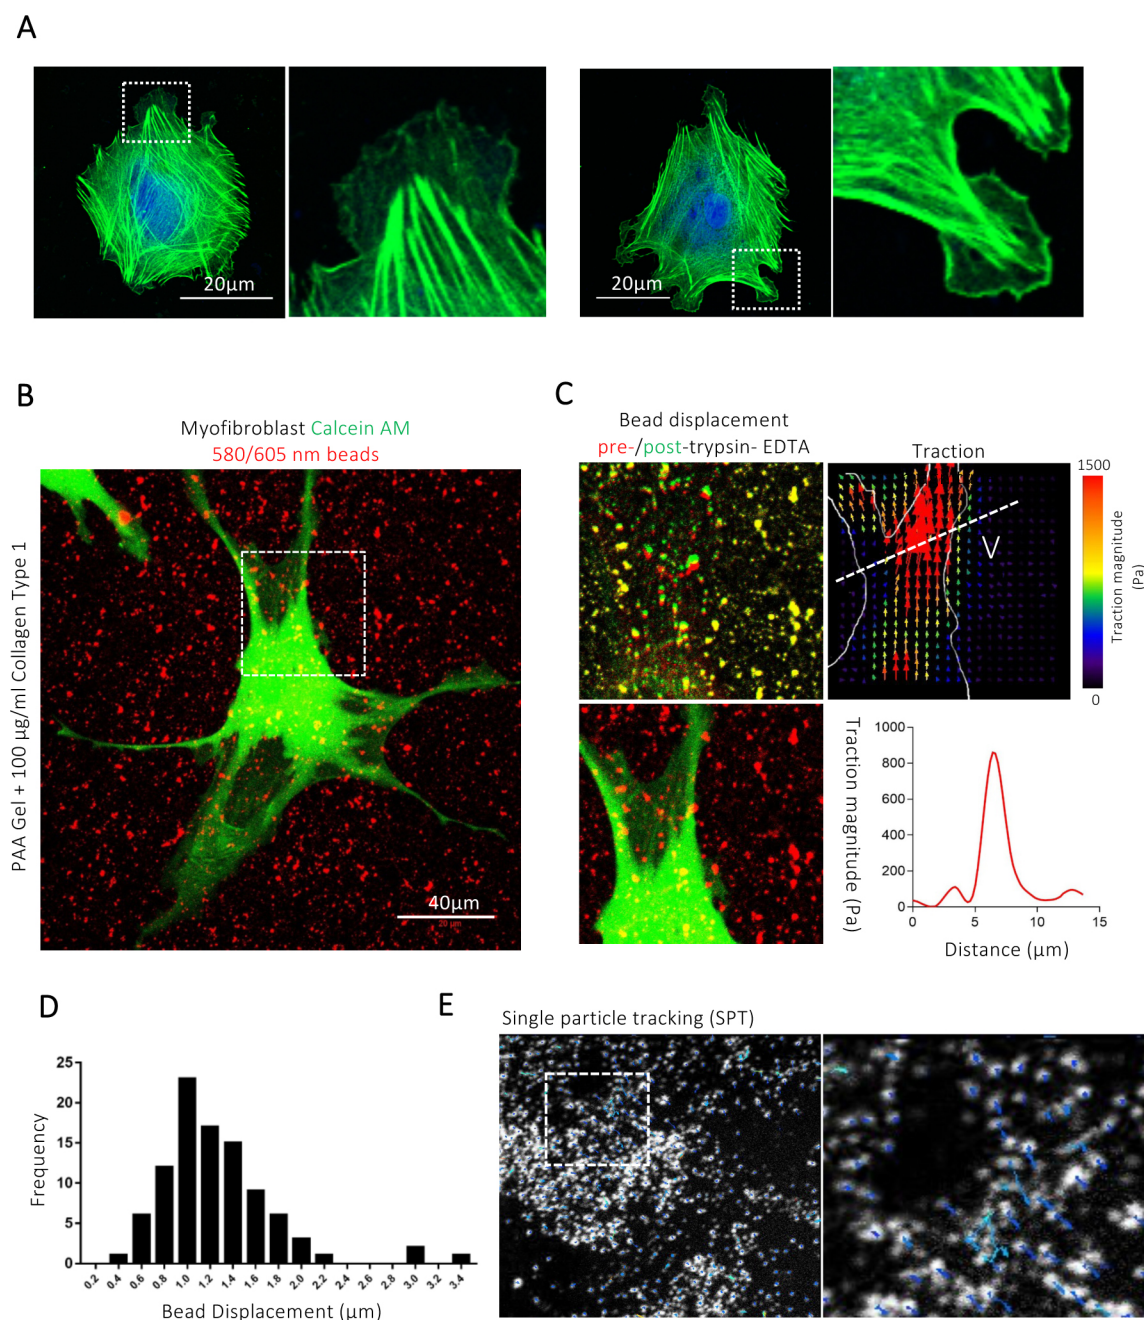

### Fig S1. Experimental and computational setup for high resolution TFM

A) Confocal images of DD myfibroblasts on the surface of 4.5kPa hydrogel stained with Phalloidin-AF488 (Green) labelling F-actin. Cells were seeded on hydrogels 60 minutes prior to staining to confirm stress fibre formation on softer environments. Right panels are zoomed regions highlighted by white dashed squares. B) Confocal image of myfibroblast tagged with Calcein AM (green) on 4.5kPa PAA gel with fluorescent beads (red) on the surface. C) Image analysis workflow of traction force microscopy (TFM). Top left, confocal image from white square in (B) demonstrating bead displacement on gel surface before and after addition of trypsin. Top right, corresponding force vector plot. Bottom left, confocal image of myfibroblasts from white dashed square in Figure 1B. Bottom right, line profile of Line V in (B) showing linear profile of peak traction force generation from one human myfibroblast. D) Histogram of bead displacements from > 50 cells from three independent experiments with cells seeded on to 4.5KPa hydrogels. E) Single particle tracking (SPT) of fiducial markers on PAA gel surface. Magnification x63. White points represent beads and tracks signify movement after removing cell from gel surface.

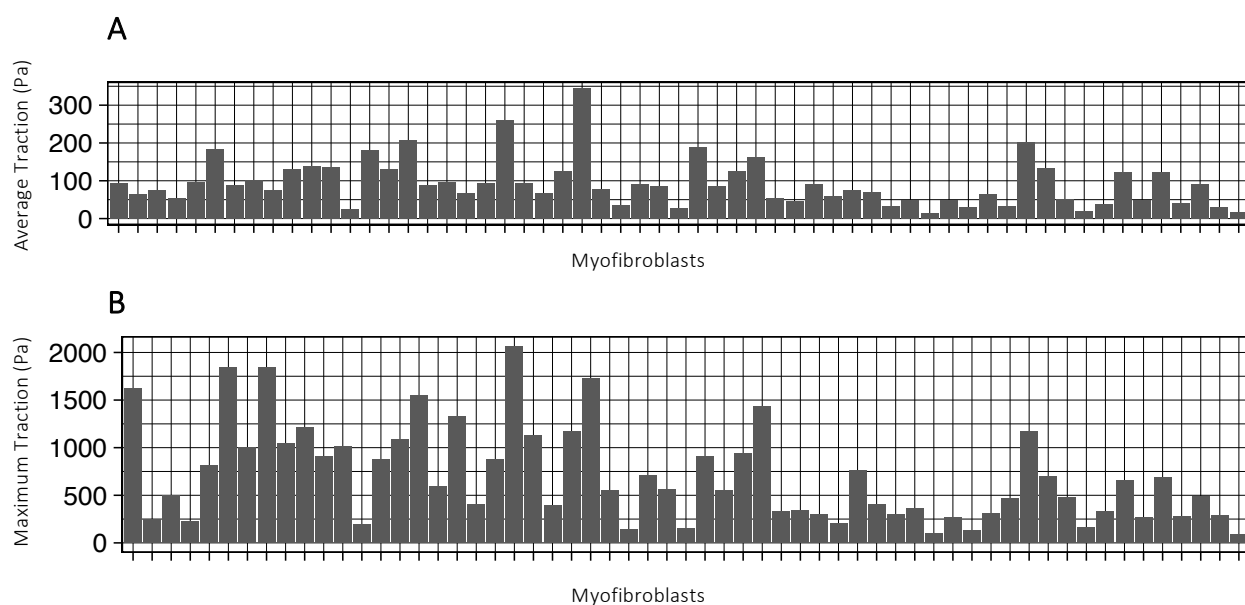

**Fig S2. Cellular traction forces of human myofibroblasts.**

A-B) Bar plots demonstrating average normalized (A) and peak (B) traction force in myofibroblasts on 4.5kPa PAA hydrogels ( $n = 46$  cells from  $>10$  independent donors). X axis represents individual myofibroblasts. Pa = Pascal.

**A** High resolution profiling of myfibroblast force generation

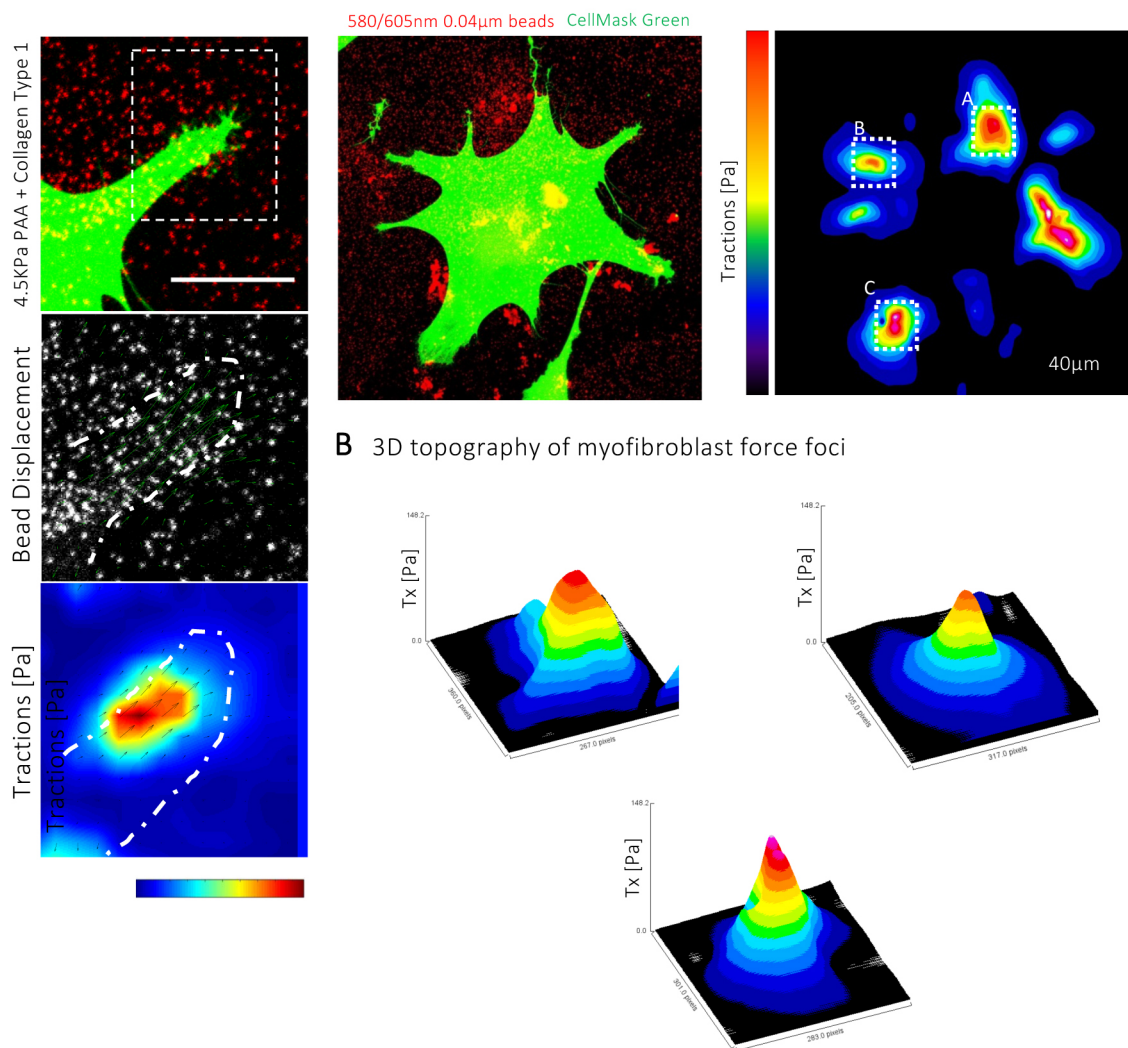

**Fig S3. Myfibroblast traction forces are discrete and localized.**

A) Traction stress heatmap and corresponding confocal image of Calcein AM tagged myfibroblast (Green) on 4.5 kPa PAA gel with marker beads (Red) showing localized area of high traction force in red. B) 3D surface plots of regions indicated by three white lines in (A).

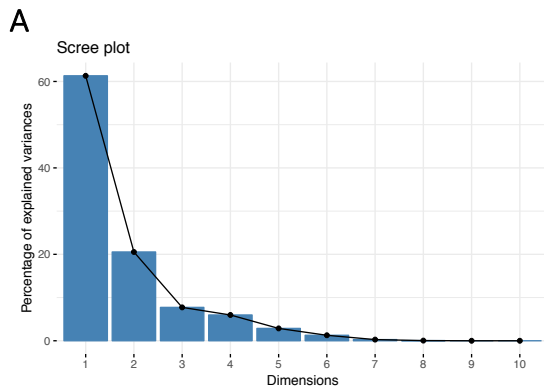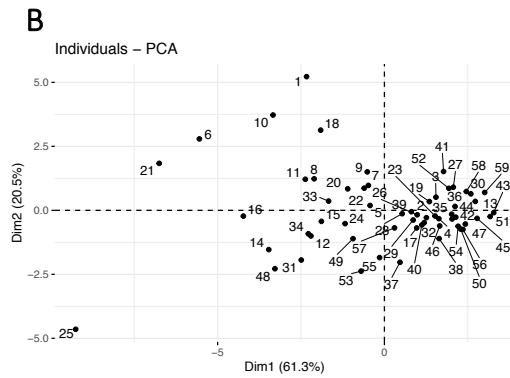

**C**

|  | 0Quantile 1 | Quantile 2 | Quantile 2 | Quantile 4 | Mean     | Max         | Min      | Median  |          |
|--|-------------|------------|------------|------------|----------|-------------|----------|---------|----------|
|  | -73.949     | 16.511     | 37.438     | 88.196     | 1627.742 | 94.08010284 | 1627.742 | -73.949 | 37.438   |
|  | 0.188       | 35.3585    | 50.74      | 79.088     | 246.718  | 64.4955709  | 246.718  | 0.188   | 50.74    |
|  | -8.78       | 14.676     | 29.175     | 100.238    | 501.704  | 74.87926362 | 501.704  | -8.78   | 29.175   |
|  | 3.404       | 27.246     | 46.2035    | 77.001     | 224.089  | 55.49664636 | 224.089  | 3.404   | 46.2035  |
|  | -3.998      | 34.647     | 62.007     | 117.774    | 817.476  | 95.58946676 | 817.476  | -3.998  | 62.007   |
|  | -70.163     | 62.56275   | 115.0595   | 220.842    | 1838.217 | 184.8466745 | 1838.217 | -70.163 | 115.0595 |
|  | -12.92      | 26.022     | 51.427     | 108.9345   | 1003.883 | 88.03194957 | 1003.883 | -12.92  | 51.427   |
|  | -13.822     | 33.569     | 63.29      | 123.352    | 1845.207 | 100.9565914 | 1845.207 | -13.822 | 63.29    |
|  | -21.027     | 26.431     | 48.174     | 91.267     | 1048.177 | 74.42248851 | 1048.177 | -21.027 | 48.174   |
|  | -71.897     | 39.31675   | 80.8835    | 171.86925  | 1211.963 | 131.1515944 | 1211.963 | -71.897 | 80.8835  |
|  | -37.907     | 35.822     | 92.1645    | 197.32625  | 913.714  | 137.7150864 | 913.714  | -37.907 | 92.1645  |
|  | -2.581      | 56.502     | 110.495    | 165.681    | 1013.564 | 135.6739786 | 1013.564 | -2.581  | 110.495  |
|  | 0.423       | 10.2305    | 18.068     | 33.475     | 196.014  | 26.162897   | 196.014  | 0.423   | 18.068   |
|  | -11.113     | 81.105     | 135.235    | 219.982    | 871.862  | 180.8450832 | 871.862  | -11.113 | 135.235  |
|  | -6.613      | 52.7185    | 85.0335    | 167.493    | 1090.56  | 130.3096729 | 1090.56  | -6.613  | 85.0335  |
|  | -21.131     | 46.7495    | 125.356    | 256.2575   | 1554.105 | 207.2889641 | 1554.105 | -21.131 | 125.356  |
|  | -0.247      | 30.676     | 52.118     | 101.316    | 593.399  | 87.35433952 | 593.399  | -0.247  | 52.118   |
|  | -54.857     | 25.828     | 55.294     | 105.39025  | 1329.1   | 96.29688204 | 1329.1   | -54.857 | 55.294   |
|  | -9.882      | 17.405     | 36.98      | 89.893     | 401.344  | 66.24065976 | 401.344  | -9.882  | 36.98    |
|  | -16.115     | 43.821     | 71.351     | 116.669    | 872.241  | 94.35488568 | 872.241  | -16.115 | 71.351   |
|  | -65.143     | 54.98      | 125.433    | 356.497    | 2067.478 | 260.7961501 | 2067.478 | -65.143 | 125.433  |
|  | -14.379     | 24.362     | 47.1765    | 119.475    | 1130.176 | 93.59135519 | 1130.176 | -14.379 | 47.1765  |
|  | -1.643      | 19.885     | 36.863     | 90.003     | 396.879  | 66.38333143 | 396.879  | -1.643  | 36.863   |
|  | 1.344       | 32.795     | 61.019     | 197.8635   | 1172.052 | 125.6989447 | 1172.052 | 1.344   | 61.019   |
|  | -5.879      | 131.0705   | 260.259    | 459.09     | 1727.203 | 344.8636953 | 1727.203 | -5.879  | 260.259  |
|  | -11.997     | 19.38525   | 55.2185    | 103.543    | 549.461  | 77.8732799  | 549.461  | -11.997 | 55.2185  |
|  | -20.615     | 15.808     | 25.706     | 49.534     | 143.72   | 34.47582742 | 143.72   | -20.615 | 25.706   |
|  | -14.078     | 30.709     | 49.311     | 112.414    | 704.702  | 91.48031991 | 704.702  | -14.078 | 49.311   |
|  | -10.77      | 22.663     | 52.672     | 125.7995   | 557.303  | 85.91640882 | 557.303  | -10.77  | 52.672   |
|  | -0.45       | 12.375     | 21.66      | 35.71025   | 147.945  | 26.96299115 | 147.945  | -0.45   | 21.66    |
|  | 1.834       | 25.219     | 129.842    | 281.052    | 908.756  | 188.5235953 | 908.756  | 1.834   | 129.842  |
|  | -6.426      | 19.811     | 42.63      | 124.263    | 555.155  | 84.6542758  | 555.155  | -6.426  | 42.63    |
|  | -25.391     | 42.233     | 77.002     | 161.474    | 942.072  | 124.9798771 | 942.072  | -25.391 | 77.002   |
|  | -0.421      | 38.8225    | 80.1485    | 227.60475  | 1430.395 | 162.1959635 | 1430.395 | -0.421  | 80.1485  |
|  | -3.051      | 15.357     | 28.4555    | 63.279     | 333.604  | 53.32546786 | 333.604  | -3.051  | 28.4555  |
|  | -6.804      | 13.9835    | 24.2       | 48.9035    | 340.872  | 46.47724549 | 340.872  | -6.804  | 24.2     |
|  | 7.033       | 51.23225   | 77.628     | 121.3845   | 294.6    | 92.41150286 | 294.6    | 7.033   | 77.628   |
|  | 2.801       | 27.389     | 52.227     | 84.321     | 204.228  | 59.25361872 | 204.228  | 2.801   | 52.227   |
|  | -0.879      | 21.554     | 35.304     | 71.018     | 764.737  | 75.67327553 | 764.737  | -0.879  | 35.304   |
|  | -5.947      | 24.85375   | 50.338     | 98.65825   | 401.037  | 71.38030113 | 401.037  | -5.947  | 50.338   |
|  | -18.287     | 16.484     | 27.084     | 40.971     | 303.583  | 33.31712864 | 303.583  | -18.287 | 27.084   |
|  | -1.6        | 15.873     | 29.91      | 62.88      | 363.333  | 48.56106402 | 363.333  | -1.6    | 29.91    |
|  | 0.309       | 6.99375    | 10.747     | 18.508     | 96.291   | 15.13409987 | 96.291   | 0.309   | 10.747   |
|  | -4.478      | 15.3015    | 28.04      | 66.8585    | 264.586  | 47.69786395 | 264.586  | -4.478  | 28.04    |
|  | -1.205      | 12.85525   | 21.0225    | 37.96425   | 129.336  | 30.13667467 | 129.336  | -1.205  | 21.0225  |
|  | -3.9        | 20.087     | 42.172     | 76.75      | 306.733  | 64.62686512 | 306.733  | -3.9    | 42.172   |
|  | -1.227      | 15.495     | 27.5505    | 46.37775   | 463.838  | 33.64296456 | 463.838  | -1.227  | 27.5505  |
|  | -0.446      | 46.493     | 129.329    | 289.816    | 1174.672 | 201.4557806 | 1174.672 | -0.446  | 129.329  |
|  | -20.873     | 45.772     | 91.688     | 170.936    | 696.612  | 133.0535466 | 696.612  | -20.873 | 91.688   |
|  | 0.007       | 14.54875   | 28.3315    | 60.94325   | 475.047  | 51.56099115 | 475.047  | 0.007   | 28.3315  |
|  | 0.444       | 7.4195     | 11.571     | 19.4375    | 164.98   | 19.19321317 | 164.98   | 0.444   | 11.571   |
|  | -6.605      | 16.951     | 28.334     | 43.607     | 331.359  | 37.88496623 | 331.359  | -6.605  | 28.334   |
|  | -2.253      | 51.834     | 103.293    | 174.0505   | 652.082  | 124.1927785 | 652.082  | -2.253  | 103.293  |
|  | -1.93       | 16.854     | 28.7775    | 63.69675   | 264.938  | 48.39036521 | 264.938  | -1.93   | 28.7775  |
|  | -4.02       | 40.277     | 77.922     | 166.701    | 689.094  | 122.8483949 | 689.094  | -4.02   | 77.922   |
|  | 0.769       | 17.88075   | 28.4095    | 47.81075   | 279.397  | 41.52593367 | 279.397  | 0.769   | 28.4095  |
|  | -3.381      | 39.90125   | 76.7955    | 123.13925  | 491.334  | 90.85562532 | 491.334  | -3.381  | 76.7955  |
|  | -1.128      | 11.383     | 18.688     | 32.672     | 288.166  | 30.33645792 | 288.166  | -1.128  | 18.688   |
|  | -0.005      | 7.611      | 13.657     | 23.119     | 94.021   | 18.04378415 | 94.021   | -0.005  | 13.657   |

**Fig S4. Principal component analysis of human myofibroblast force signatures.**

A) Bar plot with overlay of line plot (Scree plot) showing variance explained by each principal component in single cell force profiles. Dimensions is principal components. B) Scatter plot projecting single cell force profiles along the first two principal components (Dim1 and Dim2). Each point represents one cell, and each is labelled by the order in which it was collected ( $n = 59$ , from >5 independent donors). C) Summary statistics for clustering.
